# Supplementary material for: Nowcasting and Forecasting the Monthly Food Stamps Data in the US Using Online Search Data
Source: PubMed Central journal article supplement (PMC4219814; doi:10.1371/journal.pone.0111894), 2014-11-04
Supplement: pone.0111894.s001.pdf [file pone.0111894.s001.pdf]

# “Nowcasting and Forecasting the Monthly Food Stamps Data in the US using Online Search Data”

## Supporting Information

### SOFTWARE

#### Unit Root Tests:

- *Non periodic unit root tests with breaks:*

- Lee and Strazicich (2003) unit root test allowing for 1 or 2 structural breaks: the original Gauss code can be downloaded from Prof. Junsoo Lee’s website, <http://old.cba.ua.edu/~jlee/gauss>
- The Range Unit Root test and the Forward-Backward RUR test by Aparicio, Escibano and Garcia (2006) can be programmed in every statistical/econometric packages. The R code written by the author will be posted on the author’s personal website.

- *Periodic unit root tests:* the periodic unit root tests based on PAR models can be easily programmed in every statistical/econometric packages. Some `Eviews` code is reported in the Appendix of the book by Franses and Paap (2004).

#### Weak Exogeneity tests::

- The Wald test for weak exogeneity is implemented in almost all econometric and statistical software available, whereas the Wald test by Toda and Yamamoto (1995) is a straightforward extension of the standard Wald test. A step-by-step example using `Eviews` by prof. David Giles can be found here:

<http://davegiles.blogspot.com/2011/04/testing-for-granger-causality.html>

#### Cointegration tests::

- *Non periodic cointegration tests without structural break(s):* the Engle and Granger (1987) single-equation test and Johansen (1995) multivariate test are implemented in almost all econometric and statistical software available, so that it is only a matter of the researcher’s preferences which one he/she selects.

- *Non periodic cointegration tests with structural break(s):*

- Gregory and Hansen (1996) single-equation test with 1 endogenous break: the original **Gauss/R/Matlab** code can be downloaded from Prof. Bruce Hansen’s website, [http://www.ssc.wisc.edu/~bhansen/progs/joe\\_96.html](http://www.ssc.wisc.edu/~bhansen/progs/joe_96.html)  
An **Eviews** routine for the Gregory-Hansen cointegration test with 1 endogenous structural break can also be found here:  
<http://forums.eviews.com/viewtopic.php?f=15&t=976&start=15>  
A **Stata** module for Gregory-Hansen cointegration test with 1 endogenous structural break can be found at Repec:  
<http://ideas.repec.org/c/boc/bocode/s457327.html>
- Hatemi (2008) single-equation test with 2 endogenous breaks: the original **Gauss** code by Prof. Hatemi can be downloaded from Repec,  
<http://econpapers.repec.org/software/bocbocode/g00006.htm>
- Johansen et al. (2000) multivariate test allowing up to two exogenous structural breaks either in levels or in levels and trend jointly: this test is implemented in **Jmulti**, [www.jmulti.de](http://www.jmulti.de) which is a Java program interfaced with **Gauss** programs. Moreover, **R** and **Eviews** programs to compute p-values and critical values for this test can be found here:  
<http://web.uvic.ca/~dgiles/downloads/johansen/index.html>

**Stability tests for linear models and optimal number of breakpoints:** these tests are implemented in the **R** packages **strucchange** and **fxregime**. The optimal number of breakpoints can be computed with the same packages as well as with **Eviews** 8, where several (but not all) stability tests can also be found.

**Misspecification tests for linear models:** available in **Eviews** 6 or higher, as well as in several other softwares.

**Estimation of linear models (AR, ARMA):** these models are implemented in almost all econometric and statistical software available, so that it is only a matter of the researcher’s preferences which one he/she selects.

**Estimation of periodic models:** a lot of **Eviews** code is reported in Franses and Paap (2004), which can be easily modified to produce several model extensions.

**Estimation of VEC models:** they are implemented in almost all econometric and statistical software available, so that it is only a matter of the researcher’s preferences which one he/she selects.

**Estimation of PEC models:** they can be easily programmed in several statistical/econometric softwares. Some **Eviews** code is reported in Franses and Paap (2004).

**Estimation of Nonlinear models (SETAR, LSTAR, AAR, NNET):** these models are estimated using the **tsDyn** package in **R**, which is interfaced with the **mgcv** package for **AAR** models and with the **nnet** package for neural networks.

**Model Confidence Set (MCS):** this approach is implemented in the **Ox** package **Mulcom** which can be found here:

[http://mit.econ.au.dk/vip\\_htm/alunde/mulcom/mulcom.htm](http://mit.econ.au.dk/vip_htm/alunde/mulcom/mulcom.htm)

This package can be run with the **Ox** console which is free for academic research, study and teaching purposes and can be downloaded at <http://www.doornik.com/download.html> .
